# Supplementary material for: Quantitative analysis of five toxic alkaloids in Aconitum pendulum using ultra-performance convergence chromatography (UPC2) coupled with mass spectrometry
Source: Royal Society of Chemistry journal article supplement (doi:10.1039/c5ra21233b), 2015-01-01
Supplement: c5ra21233b1.pdf [file c5ra21233b1.pdf]

## Supporting information

### **Quantitative analysis of five toxic alkaloids in *Aconitum pendulum* by ultra-performance convergence chromatography (UPC<sup>2</sup>) coupled with mass spectrometry**

Tang-Juan Zhao<sup>1,2</sup>, Huan-Yang Qi<sup>1</sup>, Juan Chen<sup>1,\*</sup>, Yan-Ping Shi<sup>1,\*</sup>

<sup>1</sup> Key Laboratory of Chemistry of Northwestern Plant Resources and Key Laboratory for Natural Medicine of Gansu Province, Lanzhou Institute of Chemical Physics, Chinese Academy of Sciences, Lanzhou 730000, People's Republic of China

<sup>2</sup> University of Chinese Academy of Sciences, Beijing 100049, P. R. China

The supporting information includes UPLC-MS conditions for the determination of the five DDAs in five batches of *A. pendulum* roots samples (SF1), UPLC chromatogram and total ion chromatogram of a mixed standard solution and a real sample solution (Fig. S1) and comparison of the proposed method with the reported methods in the literature (Table S1).

#### **SF1 UPLC-MS conditions for the determination of the five DDAs in five batches of *A. pendulum* roots samples**

The UPLC-MS/MS analysis was performed on a Waters ACQUITY UPLC™ system (Waters, Milford, MA, USA) equipped with a Waters ACQUITY tandem triple quadrupole mass spectrometer (TQD-MS). The identifications and quantifications were performed on TQD-MS equipped with a Z-Spray ion interface. The UPLC analysis was conducted on a Waters Acquity UPLC BEH C18 column (50 × 2.1 mm i.d., 1.7 μm particle), using a linear gradient elution program of (A)

---

\*Correspondence authors: Juan Chen and Yan-Ping Shi; Tel: 86-931-4968121, Fax: 86-931-4968094, E-mail: [chenjuan@licp.cas.cn](mailto:chenjuan@licp.cas.cn) (J. Chen) and [shiyp@licp.cas.cn](mailto:shiyp@licp.cas.cn) (Y.-P Shi).

acetonitrile and (B) 10 mmol L<sup>-1</sup> ammonium acetate at a flow rate of 0.3 mL min<sup>-1</sup>. The gradient elution program was applied as follows: 0-4.5 min, 30-33% A; 4.5-5.0 min, 33-70% A; 5.0-6.0 min, 70% A; 6.0-7.0 min, 70-30% A; 7.0-9.0 min, 30% A. The temperatures of column and sample manager room were maintained at 30°C and 18°C, respectively. The injection volume was 2 µL, and the partial loop with needle overfill was applied for sample injection. The absorption spectra of the compounds were recorded in the range of 190-400 nm (3 D-plots were recorded), and the detection wavelength was set at 225 nm. The mass spectrometer was equipped with ESI source, and the MS analysis was performed in a positive ion ionization mode of multiple reaction monitoring (MRM) and operated under the following optimal conditions: The source temperature and the desolvation temperature were maintained at 140°C and 350°C, respectively. The electrospray capillary voltage, cone voltage and collision voltage were maintained at 2.8 kV, 50 V and 50 V, respectively. The desolvation gas and cone gas (high-purity nitrogen was used) flows were 800 L h<sup>-1</sup> and 50 L h<sup>-1</sup>, respectively. The collision gas (high-purity argon was used) flow was set at 0.15 ml min<sup>-1</sup>. The protonated molecular ions ([M+H]<sup>+</sup>) of aconitine, mesaconitine, hypaconitine, 3-acetylaconitine and deoxyaconitine, and the fragmentations of their corresponding daughter ions for quantification were selected as follows: aconitine ( $m/z$  646 → 586), mesaconitine ( $m/z$  632 → 572), hypaconitine ( $m/z$  616 → 556), 3-acetylaconitine ( $m/z$  688 → 628) and deoxyaconitine ( $m/z$  630 → 570). The UPLC chromatogram and total ion chromatogram of a mixed standard solution and a real sample solution are shown in Fig.S1.

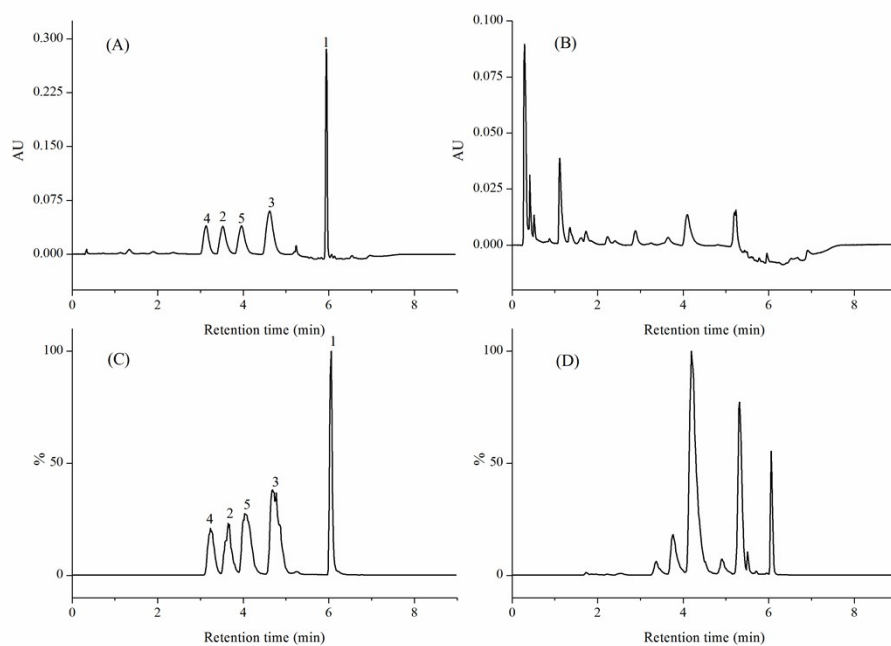

Fig. S1. UPLC chromatograms at 225 nm and total ion chromatograms obtained from (A, B) a mixed standard solution and (C, D) a real sample solution. Peak numbering: 1, 3-acetylaconitine; 2, hyaconitine; 3, deoxyaconitine; 4, mesaconitine; 5, aconitine.

**Table S1 Comparison of the proposed method with the reported methods in the literature**

| Analytical method        | Matrices                   | Analytes <sup>a</sup> | RT <sup>b</sup> (min) | LOD <sup>c</sup> | LOQ <sup>c</sup> | Precision (RSD%) | Repeatability (RSD%) | Stability (RSD%) | Accuracy (RSD%) | Ref.     |
|--------------------------|----------------------------|-----------------------|-----------------------|------------------|------------------|------------------|----------------------|------------------|-----------------|----------|
| HPLC-UV                  | <i>A. carmichaeli</i>      | 4                     | 31.98                 | 20               |                  |                  |                      |                  |                 | 33       |
|                          |                            | 5                     | 46.97                 | 24               |                  |                  |                      |                  |                 |          |
|                          |                            | 2                     | 49.20                 | 27               | –                | 0.14-0.67        | –                    | 0-0.98           | 97.1-101.9      |          |
|                          |                            | 3                     | 63.26                 | 30               |                  |                  |                      |                  |                 |          |
| UPLC-UV                  | <i>Radix Aconiti</i>       | 4                     | 20.82                 | 200              | 630              |                  |                      |                  |                 | 34       |
|                          |                            | 5                     | 27.58                 | 280              | 800              | <3.3             | –                    | –                | 103-112         |          |
| UPLC-MS EIC              | <i>Radix Aconiti</i>       | 2                     | 31.47                 | 300              | 1000             |                  |                      |                  |                 | 34       |
|                          |                            | 4                     | 20.82                 | 4                | 10               |                  |                      |                  |                 |          |
| UPLC-MS SIR              | <i>Radix Aconiti</i>       | 5                     | 27.58                 | 6                | 15               | <3.3             | –                    | –                | 103-112         | 34       |
|                          |                            | 2                     | 31.47                 | 3                | 9                |                  |                      |                  |                 |          |
| UPLC-MS SIR              | <i>Xiaohuoluo Pill</i>     | 4                     | 2.61                  | 0.45             | 1.41             |                  |                      |                  |                 | 35       |
|                          |                            | 5                     | 3.94                  | 0.39             | 1.20             | 2.4-2.82         | 1.79-3.78            | 1.11-1.76        | 99.8-101.7      |          |
| UPLC-MS SIR              | <i>SanhuangXiexin Tang</i> | 2                     | 7.21                  | 0.38             | 0.76             | 0.72-3.99        | –                    | –                | 98.7-104.8      | 36       |
|                          |                            | 4                     | 6.37                  | 2.50             | 5.00             |                  |                      |                  |                 |          |
| UPC <sup>2</sup> -MS SIR | <i>A. pendulum</i>         | 1                     | 1.02                  | 0.013            | 0.027            |                  |                      |                  |                 | This one |
|                          |                            | 2                     | 1.88                  | 0.016            | 0.044            |                  |                      |                  |                 |          |
|                          |                            | 3                     | 2.10                  | 0.034            | 0.051            | 1.2-4.3          | 0.6-1.4              | 0.9-1.9          | 95.3-98.2       |          |
|                          |                            | 4                     | 2.48                  | 0.011            | 0.042            |                  |                      |                  |                 |          |
| UPLC-MS MRM              | <i>A. pendulum</i>         | 5                     | 2.71                  | 0.029            | 0.077            |                  |                      |                  |                 | This one |
|                          |                            | 4                     | 3.28                  | 3.20             | 8.00             |                  |                      |                  |                 |          |
|                          |                            | 2                     | 3.71                  | 1.20             | 2.40             |                  |                      |                  |                 |          |
|                          |                            | 5                     | 4.10                  | 0.73             | 2.18             | 4.1-5.1          | 2.2-6.4              | 3.9-5.1          | 98.0-100.1      |          |
|                          |                            | 3                     | 4.82                  | 0.28             | 1.40             |                  |                      |                  |                 |          |
|                          |                            | 1                     | 6.05                  | 0.08             | 0.24             |                  |                      |                  |                 |          |

<sup>a</sup> Analyte numbering: 1, 3-acetylaconitine; 2, hyaconitine; 3, deoxyaconitine; 4, mesaconitine; 5, aconitine

<sup>b</sup> RT: Retention time

<sup>c</sup> ng mL<sup>-1</sup>
